# Supplementary material for: Understanding the Role of Activation Loop Mutants in Drug Efficacy for FLT3-ITD
Source: Preprints.org preprint supplement (doi:10.20944/preprints202310.0918.v1), 2023-10-16

**Supplementary Figure 1: Drug Sensitivity Scores.** (A) Four-parameter logistic regression curves plotted using GraphPad Prism 9. (B-E) Drug sensitivity metrics including interpolated IC<sub>50</sub> (B), area under the curve (C), as well as drug sensitivity scores DSS2 (D) and DSS3 (E), were determined using the Xepto50 application. (F-K) Sample plots were produced using Python scripts.

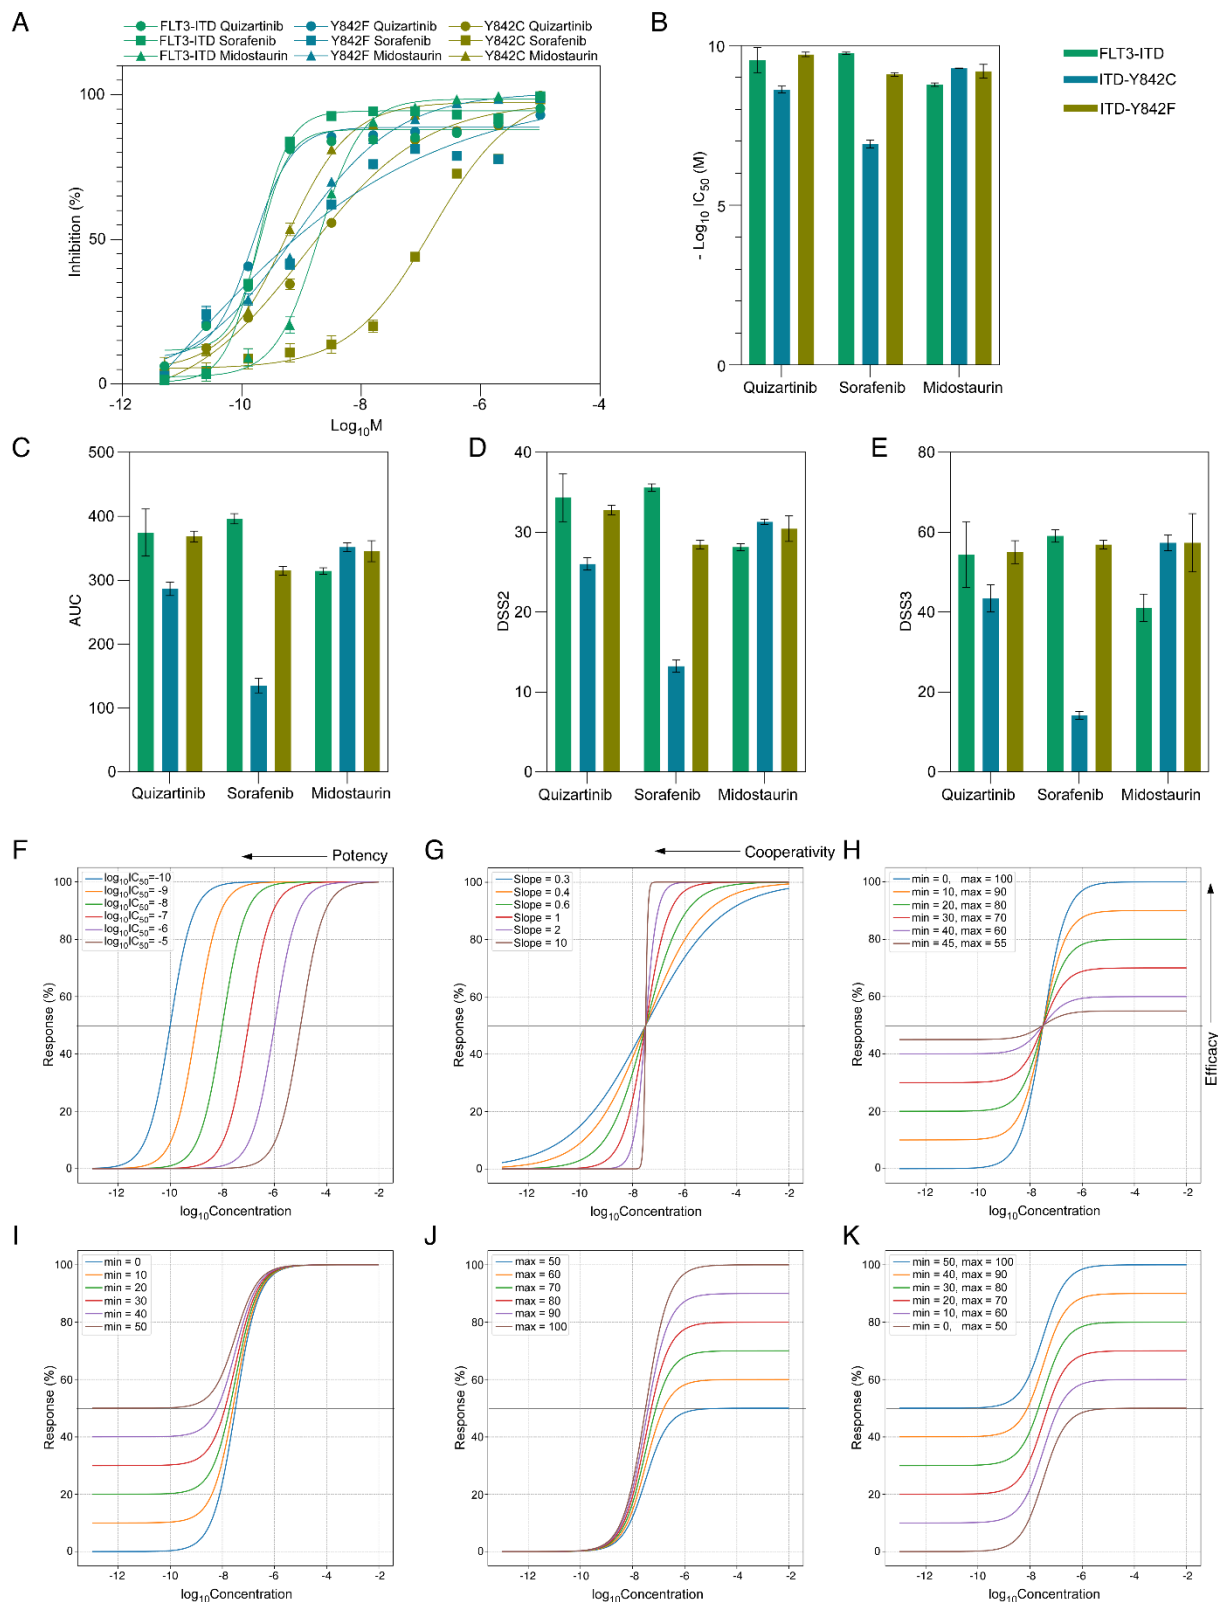

Supplement: Supplementary file 1 [file supplementary]
